# Supplementary material
Source: publisher figshare collection journal article supplement (https://tandf.figshare.com/articles/dataset/_/7200653)
Supplement: Supplementary file 3 [file 2]

Archive with 3 entries (3 files):
- tost_a_1509905_sm9828.pdf
- tost_a_1509905_sm0760.csv
- tost_a_1509905_sm0754.pdf
