# Supplementary material
Source: publisher figshare collection journal article supplement (https://tandf.figshare.com/articles/dataset/_/7200653)
Supplement: Supplementary file 3 [file 2 › tost_a_1509905_sm0760.csv]

id	sex	age	tb	ta	o2w	o2wg	o2jghr	mb	ehljghr	ehlw	ehlo2total	ehlo2mass	ewlgmin	ewlmghr	rmrmbexp	vo2	totalc	dryc
A13	i	0	41.3	30	1.9299541	0.049473029	152.5320474	45.55	54.84836413	0.640600766	0.331925389	0.359585838	0.016015019	960.9011485	0.176065703	-5.761057014	0.170792398	0.114102065
A13	i	0	43.3	33.6	1.443613087	0.034554778	114.0945579	45.55	31.29421705	0.365500407	0.253184465	0.27428317	0.00913751	548.2506102	0.131697823	-4.309292797	0.148826091	0.111145637
A13	i	0	41.6	35.8	1.371237855	0.032266463	108.3744518	45.55	31.05534212	0.36271047	0.264513169	0.286555933	0.009067762	544.0657053	0.125095181	-4.093247328	0.23642032	0.173884032
A13	i	0	42.1	38.2	1.957732974	0.045771446	154.7275237	45.55	40.5832061	0.473991035	0.242112199	0.262288216	0.011849776	710.986553	0.178599912	-5.843979027	0.501982814	0.380446651
A25	i	0	40.3	31.3	1.342980406	0.028974454	98.66794821	49	27.7307629	0.348412149	0.259432042	0.281051379	0.008710304	522.6182238	0.117035263	-4.008896735	0.149220045	0.110507584
A25	i	0	43.7	33.9	1.820659691	0.03952914	133.7627528	49	36.96595405	0.464444038	0.255096568	0.276354615	0.011611101	696.6660571	0.158663063	-5.434805047	0.185781601	0.138389352
A25	i	0	41.2	35.6	2.333897045	0.050038108	171.469987	49	48.69035385	0.6117506	0.262115504	0.283958462	0.015293765	917.6258995	0.203389605	-6.966856851	0.416767329	0.307526151
A25	i	0	42.3	37.9	3.492496142	0.072738734	256.5915533	49	76.29194125	0.958539775	0.274456932	0.297328343	0.023963494	1437.809662	0.304356788	-10.42536162	0.793749123	0.575899174
A27	i	0	41.2	30.7	1.493247743	0.027707815	107.5138375	50	43.19468659	0.553778033	0.37085476	0.401759323	0.013844451	830.6670499	0.128492469	-4.457455948	0.142214071	0.089473306
A27	i	0	42.6	34.3	1.205664866	0.021351969	86.80787037	50	39.22155614	0.502840463	0.417064872	0.451820278	0.012571012	754.2606951	0.103746251	-3.598999601	0.145260827	0.084677639
A27	i	0	41.1	36.8	1.250407475	0.021400217	90.02933818	50	44.18744799	0.566505743	0.453056907	0.49081165	0.014162644	849.7586152	0.107596308	-3.732559626	0.290792436	0.159046914
A27	i	0	41.8	39.1	1.391677178	0.022635111	100.2007568	50	53.71587254	0.688665033	0.494845388	0.536082503	0.017216626	1032.997549	0.119752424	-4.154260233	0.515435992	0.260374869
A27	i	0	43.2	40.6	1.565490314	0.025494833	112.7153026	50	59.92961456	0.768328392	0.490790895	0.531690136	0.01920821	1152.492588	0.13470887	-4.673105416	0.602111659	0.306600739
A2A	i	0	41.1	30.3	2.167300039	0.047243184	159.8827898	48.8	47.92639583	0.599694389	0.276701139	0.299759567	0.01499236	899.5415832	0.189356322	-6.469552356	0.20067593	0.145148671
A2A	i	0	43.5	33.5	1.795746972	0.038084589	132.4731372	48.8	42.52140219	0.532062674	0.296290447	0.320981318	0.013301567	798.0940103	0.156893848	-5.360438721	0.179574697	0.12636843
A2A	i	0	41	37.1	1.960236136	0.03861131	144.6075838	48.8	58.61075601	0.73338587	0.37413139	0.405309006	0.018334647	1100.078805	0.171265214	-5.851451152	0.50262465	0.314576991
A2A	i	0	41.5	38.5	4.152217775	0.079865765	306.3111473	48.8	99.4011678	1.243788971	0.299548106	0.324510449	0.031094724	1865.683457	0.36277796	-12.39467992	1.384072592	0.969476268
A81	i	0	40	31.7	1.02812516	0.025975366	76.00103854	48.7	29.48408305	0.368173037	0.358101378	0.38794316	0.009204326	552.2595555	0.089942577	-3.069030329	0.123870501	0.079512304
A81	i	0	41.7	33.7	0.88984241	0.020903006	65.77890507	48.7	27.3345573	0.341331523	0.383586486	0.415552026	0.008533288	511.9972847	0.077845308	-2.656246001	0.111230301	0.068563861
A81	i	0	39.9	36.3	0.985915347	0.018783389	72.88080593	48.7	26.88877247	0.335764928	0.34056162	0.368941755	0.008394123	503.647392	0.086249973	-2.943030886	0.273865374	0.180597339
A81	i	0	40.2	39.3	1.007129698	0.019219479	74.44901259	48.7	36.83358536	0.459947592	0.456691519	0.494749145	0.01149869	689.9213873	0.08810585	-3.006357308	1.119032998	0.607980118
A81	i	0	43.6	41.7	2.819441598	0.048361593	208.4186808	48.7	108.8817224	1.35962561	0.48223223	0.52241825	0.03399064	2039.438415	0.246650752	-8.416243576	1.483916631	0.768324204
A0D	f	1	40.4	30.5	1.585546272	0.028078086	110.8343025	51.5	47.02806532	0.621011632	0.391670456	0.424309661	0.015525291	931.5174477	0.133929358	-4.732973946	0.160156189	0.097427741
A0D	f	1	40.4	35.4	1.582893549	0.029216828	110.6488694	51.5	42.12733399	0.556296846	0.351442993	0.380729909	0.013907421	834.4452695	0.133705286	-4.725055369	0.31657871	0.205319341
A0D	f	1	42.1	38	1.991716912	0.03425198	139.2268133	51.5	61.87974772	0.817130002	0.410264128	0.444452805	0.02042825	1225.695003	0.168238148	-5.945423619	0.485784613	0.286484612
A0D	f	1	43.2	39	2.272299314	0.041395485	158.8403404	51.5	61.08854861	0.806682116	0.35500698	0.384590895	0.020167053	1210.023174	0.191938636	-6.782983027	0.541023646	0.348956476
A0E A55	m	1	40.8	31.2	0.867008996	0.015538047	53.62942243	58.2	16.5029664	0.246275037	0.284051305	0.307722247	0.006156876	369.4125555	0.067829231	-2.588086555	0.090313437	0.064659787
A0E A55	m	1	41	33.1	0.807561634	0.014752236	49.95226601	58.2	13.99949331	0.208915516	0.258699159	0.280257422	0.005222888	313.3732734	0.06317845	-2.410631743	0.102222992	0.07577799
A0E A55	m	1	41.7	36	0.83421462	0.014047738	51.6009043	58.2	18.0633408	0.269560624	0.323131024	0.350058609	0.006739016	404.3409365	0.065263609	-2.490192894	0.146353442	0.099062105
A0E A55	m	1	42.2	38.8	0.870334434	0.013229031	53.83511964	58.2	24.81713886	0.370348072	0.425523865	0.460984187	0.009258702	555.5221084	0.068089392	-2.598013237	0.255980716	0.147054812
A0E A55	m	1	42.3	41.4	0.989186653	0.0136732	61.1868033	58.2	33.31426589	0.497151352	0.502585989	0.544468155	0.012428784	745.7270287	0.077387628	-2.95279598	1.099096281	0.54670589
A17	f	1	40.3	30.5	1.400634817	0.030707609	100.9466535	49.95	26.80008358	0.343247224	0.245065466	0.265487588	0.008581181	514.8708365	0.120598849	-4.180999455	0.14292192	0.107896693
A17	f	1	40.7	33.3	1.431641169	0.032642704	103.1813455	49.95	23.29882932	0.298404237	0.208435077	0.225804667	0.007460106	447.6063557	0.123268589	-4.273555729	0.193465023	0.153140126
A17	f	1	41.3	35.8	1.18775358	0.024946567	85.60386165	49.95	27.76151834	0.355560985	0.299355852	0.324302173	0.008889025	533.3414774	0.102269138	-3.545533076	0.215955196	0.151307745
A17	f	1	42	39.4	1.534912842	0.028372386	110.624349	49.95	49.16447349	0.629683449	0.410240524	0.444427234	0.015742086	944.5251733	0.132160589	-4.58182938	0.590351093	0.348165151
A17	f	1	42.7	41.5	1.954923257	0.032932083	140.8953699	49.95	73.66341654	0.943458373	0.482606348	0.522823544	0.023586459	1415.18756	0.168324743	-5.835591812	1.629102714	0.842887403
A32	f	1	40.1	30.7	0.69807195	0.015775268	50.16085868	50.1	16.67968369	0.214269783	0.306945126	0.332523887	0.005356745	321.4046742	0.059993187	-2.083796866	0.074262973	0.051468316
A32	f	1	40	33.1	0.590104705	0.014147257	42.40273328	50.1	16.33639693	0.209859868	0.35563158	0.385267545	0.005246497	314.7898024	0.050714345	-1.761506581	0.085522421	0.055107947
A32	f	1	40.3	36	0.648359082	0.013343625	46.58867656	50.1	18.89361545	0.242710291	0.374345478	0.405540935	0.006067757	364.0654362	0.0557208	-1.935400245	0.150781182	0.094336928
A32	f	1	41.1	38.9	0.681398498	0.014422634	48.96276635	50.1	28.91443347	0.371439261	0.545113119	0.590539212	0.009285982	557.158891	0.058560249	-2.034025368	0.30972659	0.140890562
A32	f	1	41.9	41.8	0.794234501	0.015237341	57.07074259	50.1	47.57223541	0.611120255	0.769445616	0.833566084	0.015278006	916.6803823	0.068257518	-2.370849257	7.94234501	1.83114246
A3F A65	f	1	40.5	30.5	0.792739988	0.01823976	60.84997777	46.9	11.4722868	0.137961603	0.17403134	0.188533952	0.00344904	206.9424042	0.071007691	-2.366388025	0.079273999	0.065477839
A3F A65	f	1	40.1	33.4	0.79933119	0.017861571	61.35591227	46.9	14.36951354	0.172802612	0.216183997	0.23419933	0.004320065	259.2039173	0.071598082	-2.386063255	0.119303163	0.093511728
A3F A65	f	1	40	36.2	1.059403057	0.017749719	81.31878476	46.9	24.52281753	0.294902601	0.278366764	0.301563994	0.007372565	442.3539009	0.094893365	-3.162397185	0.278790278	0.201184331
A3F A65	f	1	41.1	39.1	1.08310129	0.020246381	83.13783886	46.9	50.39268607	0.606004353	0.559508477	0.606134183	0.015150109	909.0065295	0.097016075	-3.233138178	0.541550645	0.238548469
A3F A65	f	1	41.6	42.3	0.863392367	0.017012822	66.27318807	46.9	47.29504845	0.568753275	0.658742533	0.713637744	0.014218832	853.1299124	0.077336201	-2.577290647	1.233417667	0.420912989
A5F	m	1	39.6	30.3	0.614452753	0.014612622	49.70853732	44.5	16.92684673	0.193139661	0.314327929	0.340521923	0.004828492	289.7094921	0.05688094	-1.834187322	0.066070188	0.045302483
A5F	m	1	39.7	32.8	0.499541606	0.012569983	40.41235465	44.5	12.91090706	0.14731676	0.294903884	0.319479208	0.003682919	220.9751401	0.046243419	-1.491168973	0.072397334	0.051047079
A5F	m	1	40	35.4	0.52617776	0.012230129	42.56718959	44.5	15.73966144	0.179593573	0.341317301	0.369760409	0.004489839	269.3903592	0.048709174	-1.570679881	0.11438647	0.075344388
A5F	m	1	41.7	38.9	0.571136777	0.010746062	46.20432356	44.5	29.33410777	0.334709691	0.586041216	0.634877984	0.008367742	502.0645369	0.052871107	-1.704885903	0.20397742	0.084438245
A5F	m	1	42.8	41.7	0.554164247	0.008043774	44.83126493	44.5	37.19160571	0.424365757	0.765776139	0.829590817	0.010609144	636.5486362	0.05129993	-1.654221633	0.503785679	0.117998627
A61 A59	m	1	40.7	30.3	1.656346551	0.029607074	109.7120071	54.35	42.6478046	0.594335431	0.358823116	0.388725042	0.014858386	891.5031461	0.135263646	-4.944318063	0.159264091	0.102116454
A61 A59	m	1	40.4	32	1.344202322	0.023519242	89.03640033	54.35	38.99282259	0.543399976	0.404254603	0.437942487	0.013584999	815.0999646	0.109772745	-4.012544244	0.160024086	0.095333613
A61 A59	m	1	40.4	34.8	1.433883825	0.024683115	94.97666549	54.35	41.74116593	0.581700607	0.405681825	0.439488644	0.014542515	872.5509109	0.117096482	-4.280250223	0.256050683	0.152175575
A61 A59	m	1	41.1	38.6	1.547578662	0.020726756	102.5075103	54.35	71.22849616	0.992633017	0.64141038	0.694861245	0.024815825	1488.949526	0.126381241	-4.619637797	0.619031465	0.221978258
A61 A59	m	1	41.6	41.8	1.858861362	0.023492571	123.1260516	54.35	87.71745758	1.222421492	0.657618431	0.712419967	0.030560537	1833.632238	0.151801787	-5.548839887	9.29430681	3.18219935
A66	m	1	40.1	31	0.781565374	0.014380918	48.89027538	57.55	16.40869773	0.242133476	0.309805786	0.335622935	0.006053337	363.2002133	0.061576768	-2.333030969	0.085886305	0.059278231
A66	m	1	40.8	33.5	0.843747714	0.01575509	52.78004813	57.55	14.70754026	0.217030498	0.257222028	0.278657197	0.005425762	325.5457469	0.066475894	-2.518649892	0.115581879	0.085851673
A66	m	1	41.2	36.5	1.315661632	0.021869903	82.3002932	57.55	32.4592662	0.478982249	0.364061881	0.394400371	0.011974556	718.473373	0.103656321	-3.927348154	0.279928007	0.17801689
A66	m	1	42.1	39.9	1.133042221	0.016525697	70.87666368	57.55	38.26709427	0.564684942	0.498379435	0.539911055	0.014117124	847.0274135	0.089268384	-3.382215584	0.515019191	0.258344218
A66	m	1	43.4	42.3	1.951663038	0.027912202	122.0849163	57.55	66.80431498	0.985791879	0.505103524	0.547195485	0.024644797	1478.687818	0.153764619	-5.825859814	1.774239125	0.87806469
A76	f	1	40.2	29.5	1.164881115	0.025546826	83.20579396	50.4	22.4330084	0.289903493	0.248869596	0.26960873	0.007247587	434.8552397	0.099737312	-3.477257061	0.108867394	0.08177361
A76	f	1	40.5	32.4	0.994163133	0.022289009	71.01165238	50.4	18.30684916	0.23658082	0.237969818	0.257800636	0.00591452	354.87123	0.08512041	-2.967651144	0.122736189	0.093528681
A76	f	1	41.1	36.5	1.023947695	0.023754192	73.13912106	50.4	17.72588721	0.229073004	0.223715533	0.242358494	0.005726825	343.609506	0.087670569	-3.056560283	0.222597325	0.172798846
A76	f	1	42.5	38.6	1.229131139	0.02604417	87.79508133	50.4	28.42378168	0.367322717	0.298847459	0.323751414	0.009183068	550.9840757	0.105238409	-3.669048175	0.315161831	0.220976518
A76	f	1	43.9	40.8	1.934665269	0.034468012	138.1903763	50.4	62.25539053	0.804531201	0.415850335	0.45050453	0.02011328	1206.796801	0.165646357	-5.775120205	0.624085571	0.364559377
A7C	f	1	41.7	31.1	0.807931347	0.01632806	69.25125831	42	34.10972992	0.367335553	0.45466184	0.492550327	0.009183389	551.0033295	0.077552741	-2.411735364	0.076219938	0.041565641
A7C	f	1	41.3	33.6	0.75879731	0.014258536	65.03976944	42	36.45052575	0.392544123	0.517324084	0.560434424	0.009813603	588.8161852	0.072836401	-2.265066598	0.098545105	0.047565349
A7C	f	1	42	36	0.812174825	0.019248006	69.61498498	42	21.95446905	0.236432744	0.291110653	0.315369874	0.005910819	354.6491155	0.07796007	-2.424402462	0.135362471	0.095957014
A7C	f	1	42.5	38.7	0.764799475	0.01638878	65.55424072	42	27.72849536	0.298614565	0.390448183	0.422985532	0.007465364	447.9218482	0.073412544	-2.282983508	0.20126302	0.122680239
A7C	f	1	42.7	41	0.821508759	0.015824247	70.41503649	42	42.0830794	0.453202394	0.551670799	0.597643366	0.01133006	679.8035903	0.078856027	-2.452264952	0.483240446	0.216650803
